# Supplementary material for: A mitochondria-targetable fluorescent probe for detection of bisulfite in living cells
Source: Royal Society of Chemistry journal article supplement (doi:10.1039/c8ay01543k), 2018-01-01
Supplement: c8ay01543k1.pdf [file c8ay01543k1.pdf]

## A mitochondria-targetable fluorescent probe for detection of bisulfite in living cells

Xiao Guo,<sup>a</sup> Wei-Jin Zhu,<sup>a</sup> Xue-Rui Wei,<sup>b</sup> Yu-Jie Xu,<sup>\*b</sup> Ru Sun<sup>a</sup> and Jian-Feng Ge<sup>\*a, c</sup>

<sup>a</sup> College of Chemistry, Chemical Engineering and Material Science, Soochow University, 199 Ren' Ai Road, Suzhou 215123, China.

<sup>b</sup> State Key Laboratory of Radiation Medicine and Protection, School of Radiation Medicine and Protection and Collaborative Innovation Center of Radiation Medicine of Jiangsu Higher Education Institutions, Soochow University, Suzhou 215123, China.

<sup>c</sup> Jiangsu Key Laboratory of Medical Optics, Suzhou Institute of Biomedical Engineering and Technology, Chinese Academy of Sciences, Suzhou 215163, China

### Index

|                                                                                                                                                                                                                                                                                                                                                          |    |
|----------------------------------------------------------------------------------------------------------------------------------------------------------------------------------------------------------------------------------------------------------------------------------------------------------------------------------------------------------|----|
| <b>Fig. S1</b> Detection limit test of probe <b>3</b> (1 $\mu$ M) toward different NaHSO <sub>3</sub> concentration in PBS buffer. (a) Emission spectra ( $\lambda_{\text{ex}}$ = 380 nm, slit width: 5 nm/10 nm). (b) Plot of the fluorescence intensity upon addition of NaHSO <sub>3</sub> (0–0.5 eq.).....                                           | S2 |
| <b>Fig. S2</b> Emission titration of probe <b>3</b> (10 $\mu$ M) toward NaHSO <sub>3</sub> (0–5.0 eq.) in PBS buffer (20 mM, pH=7.4) containing 10% DMSO. ( $\lambda_{\text{ex}}$ = 514 nm, slit: 5 nm/5 nm) .....                                                                                                                                       | S2 |
| <b>Fig. S3</b> The pH-dependent and time responses of probe <b>3</b> (10 $\mu$ M) to HSO <sub>3</sub> <sup>-</sup> (4.0 eq.) in PBS buffer. (a) pH-dependent response for free probe and probe + NaHSO <sub>3</sub> ; (b) time response. All data represent the fluorescence intensity at 460 nm ( $\lambda_{\text{ex}}$ = 380 nm, slit: 3 nm/3 nm)..... | S2 |
| <b>Table S1.</b> Optical properties of probe <b>3</b> .....                                                                                                                                                                                                                                                                                              | S3 |
| <b>Table S2.</b> Comparison with other skeletons based on C=C double bond for HSO <sub>3</sub> <sup>-</sup> detection. ....                                                                                                                                                                                                                              | S3 |
| <b>Fig. S4</b> <sup>1</sup> H-NMR spectrum of compound <b>3</b> . ....                                                                                                                                                                                                                                                                                   | S4 |
| <b>Fig. S5</b> <sup>13</sup> C-NMR spectrum of compound <b>3</b> . ....                                                                                                                                                                                                                                                                                  | S4 |
| <b>Fig. S6</b> HRMS(ESI+) of compound <b>3</b> .....                                                                                                                                                                                                                                                                                                     | S5 |
| <b>Fig. S7</b> HRMS(ESI+) of compound <b>3</b> +NaHSO <sub>3</sub> .....                                                                                                                                                                                                                                                                                 | S6 |

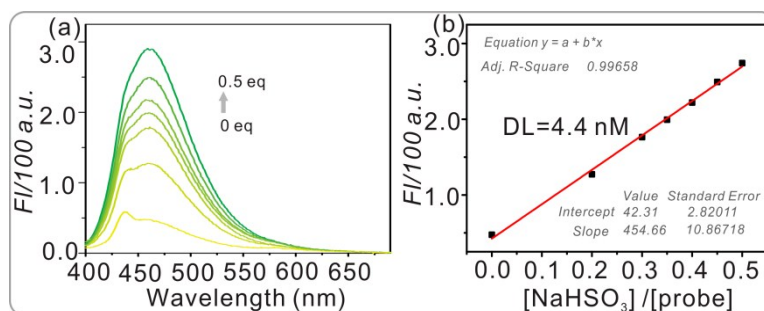

**Fig. S1** Detection limit test of probe **3** (1  $\mu\text{M}$ ) toward different  $\text{NaHSO}_3$  concentration in PBS buffer. (a) Emission spectra ( $\lambda_{\text{ex}} = 380$  nm, slit width: 5 nm/10 nm). (b) Plot of the fluorescence intensity upon addition of  $\text{NaHSO}_3$  (0–0.5 eq.).

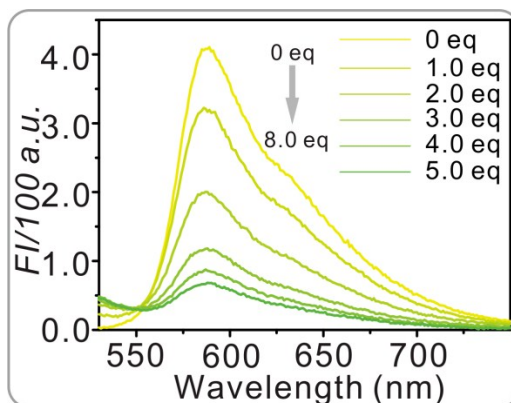

**Fig. S2** Emission titration of probe **3** (10  $\mu\text{M}$ ) toward  $\text{NaHSO}_3$  (0–5.0 eq.) in PBS buffer (20 mM, pH=7.4) containing 10% DMSO. ( $\lambda_{\text{ex}} = 514$  nm, slit: 5 nm/5 nm)

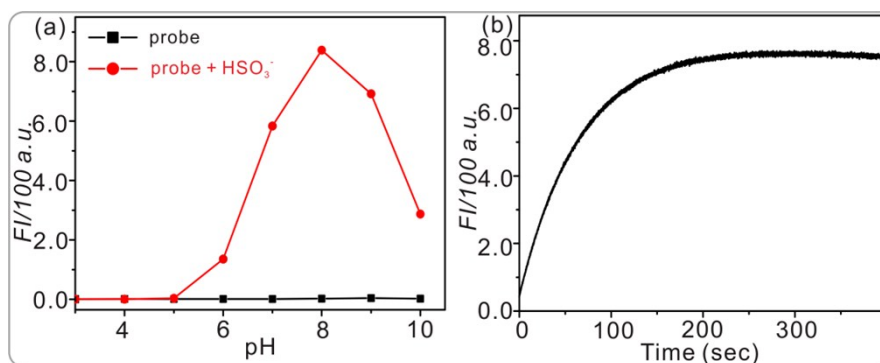

**Fig. S3** The pH-dependent and time responses of probe **3** (10  $\mu\text{M}$ ) to  $\text{HSO}_3^-$  (4.0 eq.) in PBS buffer. (a) pH-dependent response for free probe and probe +  $\text{NaHSO}_3$ ; (b) time response. All data represent the fluorescence intensity at 460 nm ( $\lambda_{\text{ex}} = 380$  nm, slit: 3 nm/3 nm).

**Table S1.** Optical properties of probe **3**

| probe                       | pH  | $\lambda_{\text{Abs, max}}$<br>(nm) | $\lambda_{\text{Em, max}}$<br>(nm) | Stokes Shift<br>(nm) | $\epsilon$ ( $10^4 \text{ M}^{-1}\cdot\text{cm}^{-1}$ ) | $\phi$            |
|-----------------------------|-----|-------------------------------------|------------------------------------|----------------------|---------------------------------------------------------|-------------------|
| <b>3</b>                    | 7.4 | 528                                 | 586                                | 58                   | 5.40                                                    | 0.01 <sup>a</sup> |
| <b>3</b> + $\text{HSO}_3^-$ | 7.4 | 352                                 | 460                                | 108                  | 1.01                                                    | 0.76 <sup>b</sup> |

<sup>a</sup> Quantum yield of Rhodamine B ( $\Phi_s = 0.69$  in ethyl alcohol solution) and <sup>b</sup>Quinine Sulfate ( $\Phi_s = 0.546$  in 0.5 M  $\text{H}_2\text{SO}_4$ ) were used as the reference compounds in quantum yield measurements

**Table S2.** Comparison with other skeletons based on C=C double bond for  $\text{HSO}_3^-$  detection.

| Probe                                                                               | $\lambda_{\text{abs,max}}/\lambda_{\text{em,max}}$<br>(nm) | Detection limit    | Selectivity                                         | Bioimaging | Reference |
|-------------------------------------------------------------------------------------|------------------------------------------------------------|--------------------|-----------------------------------------------------|------------|-----------|
| 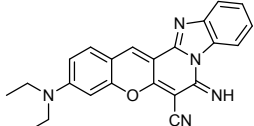   | 340/575                                                    | 1.76 $\mu\text{M}$ | Interference for biothiols                          | No         | 1         |
|    | 400/465                                                    | 97 nM              | Interference for $\text{H}_2\text{S}$ and biothiols | No         | 2         |
|   | 445/633                                                    | 0.38 $\mu\text{M}$ | No interference                                     | Yes        | 3         |
|  | 470/592                                                    | 3.0 nM             | Interference for $\text{H}_2\text{S}$ and NaCN      | Yes        | 4         |
|  | 560/643                                                    | 0.1 $\mu\text{M}$  | Interference for $\text{H}_2\text{S}$ and NaCN      | Yes        | 5         |
|  | 446/575                                                    | 21 nM              | Interference for $\text{H}_2\text{S}$               | Yes        | 6         |
|  | 380/460                                                    | 4.4 nM             | No interference                                     | Yes        | This work |

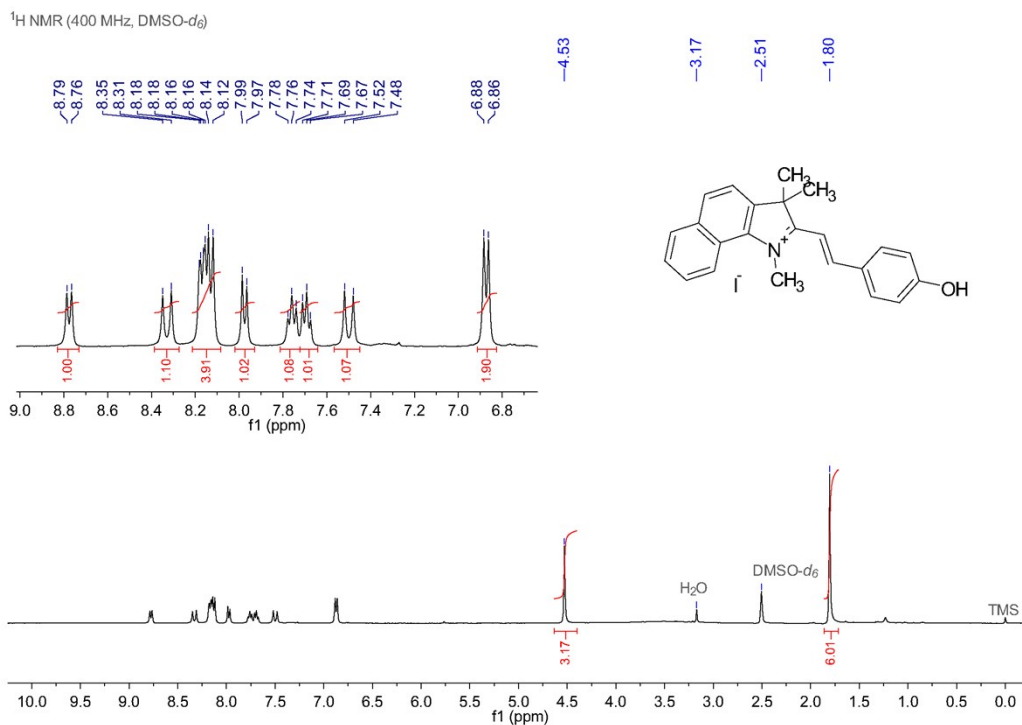Fig. S4 <sup>1</sup>H-NMR spectrum of compound **3**.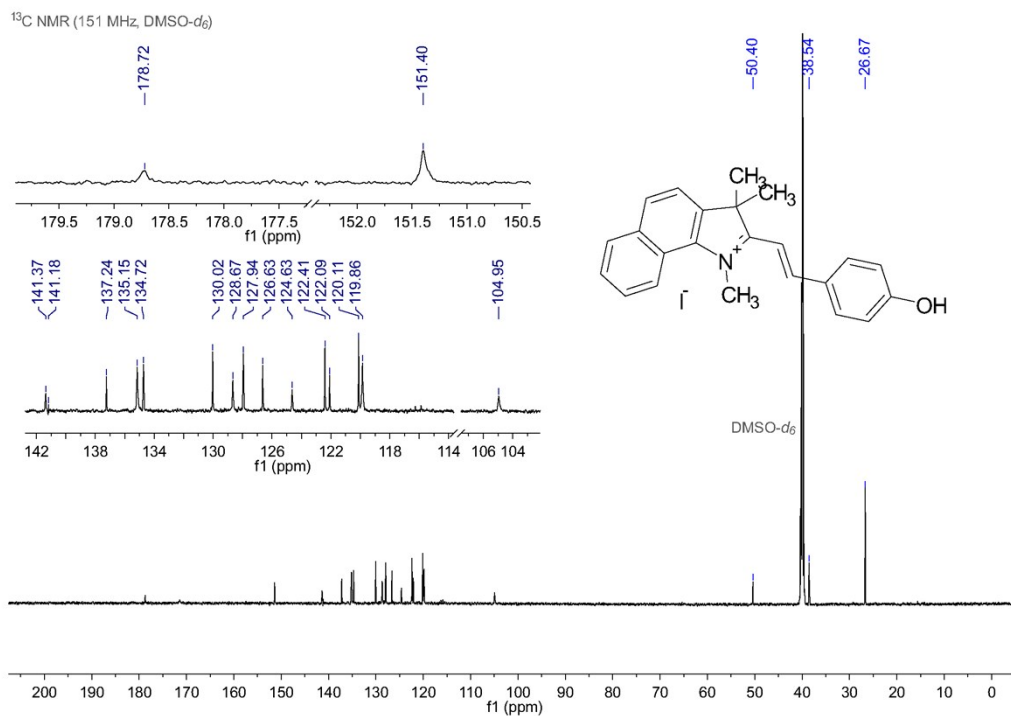Fig. S5 <sup>13</sup>C-NMR spectrum of compound **3**.

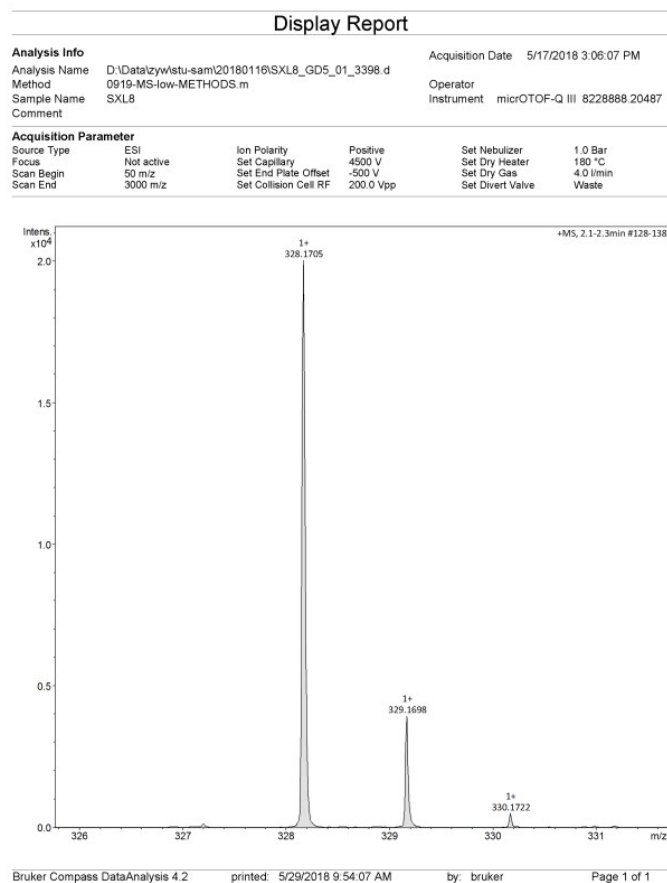

**Fig. S6** HRMS(ESI<sup>+</sup>) of compound **3**.

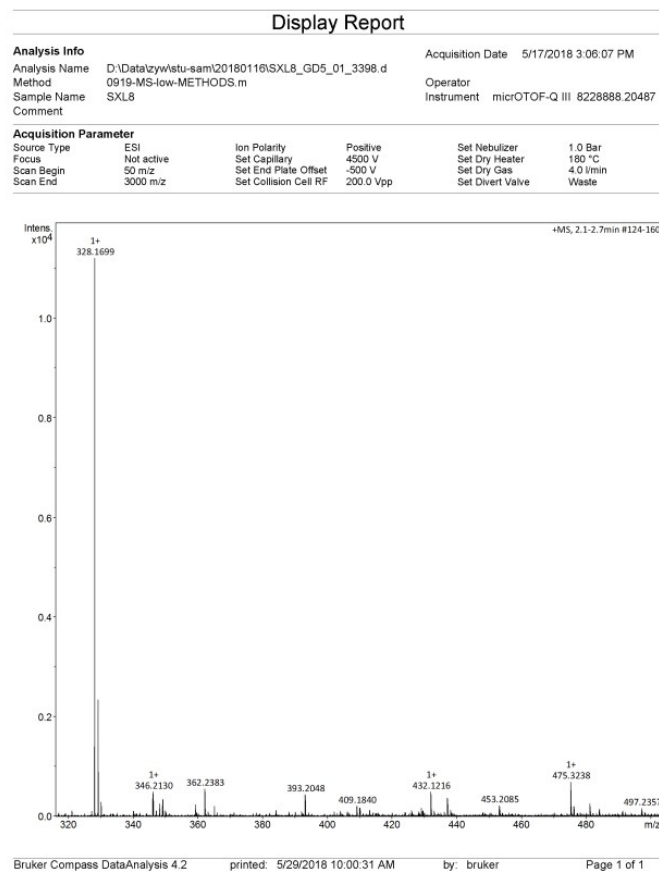

**Fig. S7** HRMS(ESI<sup>+</sup>) of compound **3** +NaHSO<sub>3</sub>.

## References

1. M. H. Lee, N. Park, C. Yi, J. H. Han, J. H. Hong, K. P. Kim, D. H. Kang, J. L. Sessler, C. Kang and J. S. Kim, *J. Am. Chem. Soc.*, 2014, 136, 14136-14142.
2. Y. Sun, S. W. Fan, S. Zhang, D. Zhao, L. Duan and R. F. Li, *Sensor Actuat. B-Chem.*, 2014, 193, 173-177.
3. Z. Liu, S. Guo, J. Piao, X. Zhou and X. Wu, *RSC Adv.*, 2014, 4, 54554-54557.
4. Y.-Q. Sun, J. Liu, J. Zhang, T. Yang and W. Guo, *Chem. Commun.*, 2013, 49, 2637-2639.
5. C. Y. Liu, L. Y. Liu, X. Li, C. X. Shao, X. Huang, B. C. Zhu and X. L. Zhang, *RSC Adv.*, 2014, 4, 33507-33513.
6. J. B. Chao, Y. Zhang, H. F. Wang, Y. B. Zhang, F. J. Huo, C. X. Yin, L. P. Qin and Y. Wang, *Sensor Actuat. B-Chem.*, 2013, 188, 200-206.
